# Supplementary material
Source: PubMed Central journal article supplement (PMC7642093)
Supplement: NIHMS1620444-supplement-1.pdf [file NIHMS1620444-supplement-1.pdf]

Supplementary Fig. 1.: Cartoon representation of available crystal structures using PyMol program. (A) HVEM:LIGHT (4RSU), (B) HVEM:CD160 (6NG3), and (C) HVEM:BTLA (2AW2). HVEM is colored with brown while LIGHT, CD160, and BTLA are represented using blue, magenta, and green colors respectively. Related to Fig.1.

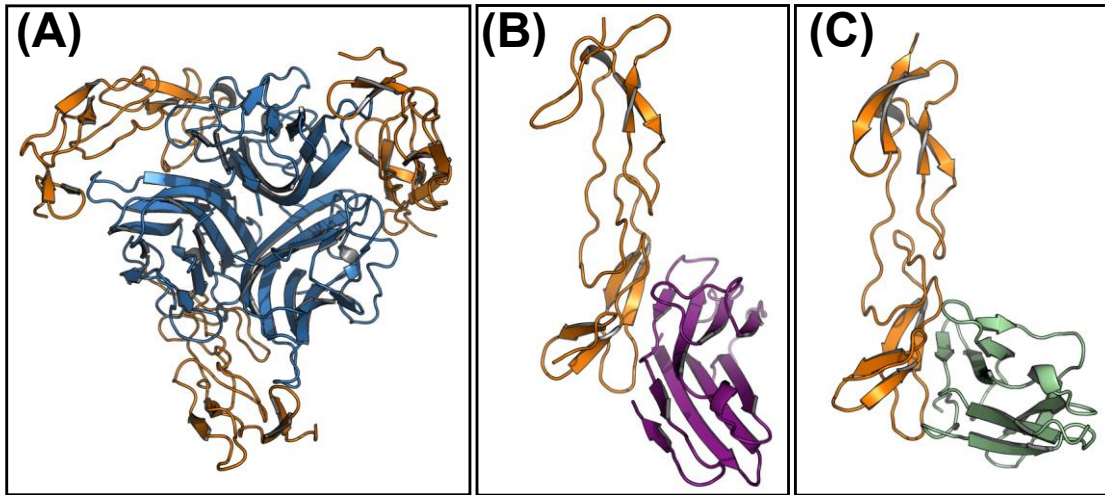

Supplementary Figure 2: Flowchart of the decision process how to utilize rs-pharmacophores for selecting residues for mutational experiments. RS-PH stands for rs-pharmacophore. Related to Fig. 1.

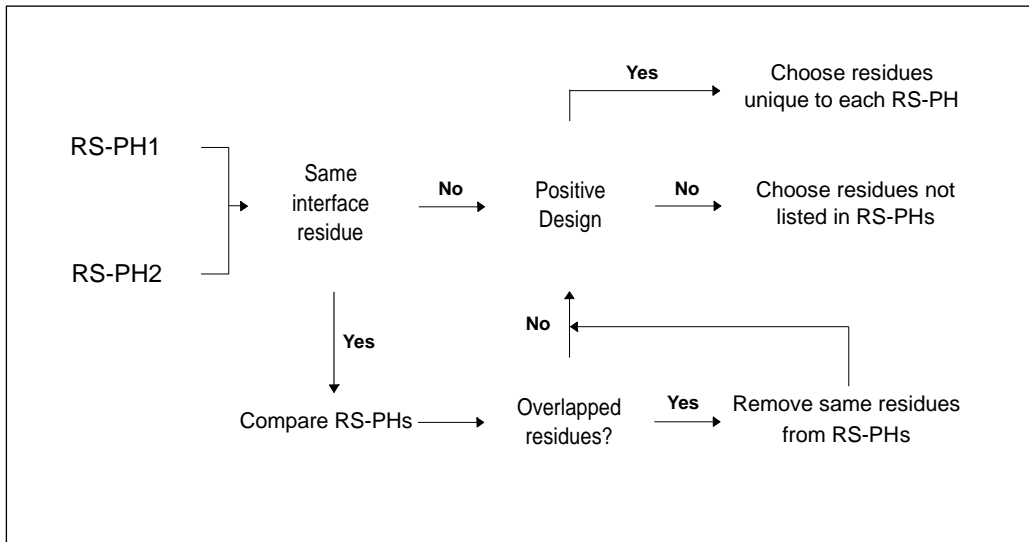

Supplementary Figure 3: hHVEM mutants show expression similar to wild-type protein. All of the HVEM mutants were expressed in the context of the full-length protein with the addition of a C-terminal GFP fusion. The data shows the average percent GFP expression for the subset of hHVEM mutants that were the focus of follow-up experiments. The error bars show the standard deviations. There was no statistical difference (by One-way ANOVA) between WT and any of the mutants suggesting all the mutants express comparable to WT hHVEM. Related to Fig. 2, 3 and 4

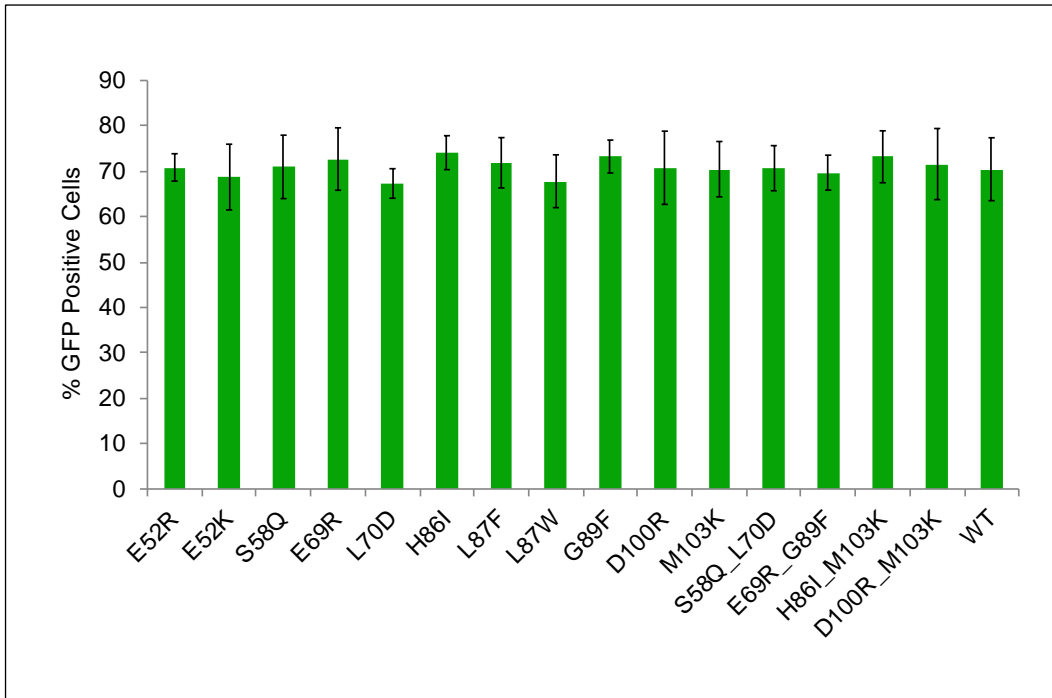

Supplementary Figure 4: Charts showing EC50 and Bmax data obtained from the titration experiments with error bars showing the 95% confidence interval from the fits. Color codes of ligands follow the ones used in other figures. Related to Fig 3 and 4.

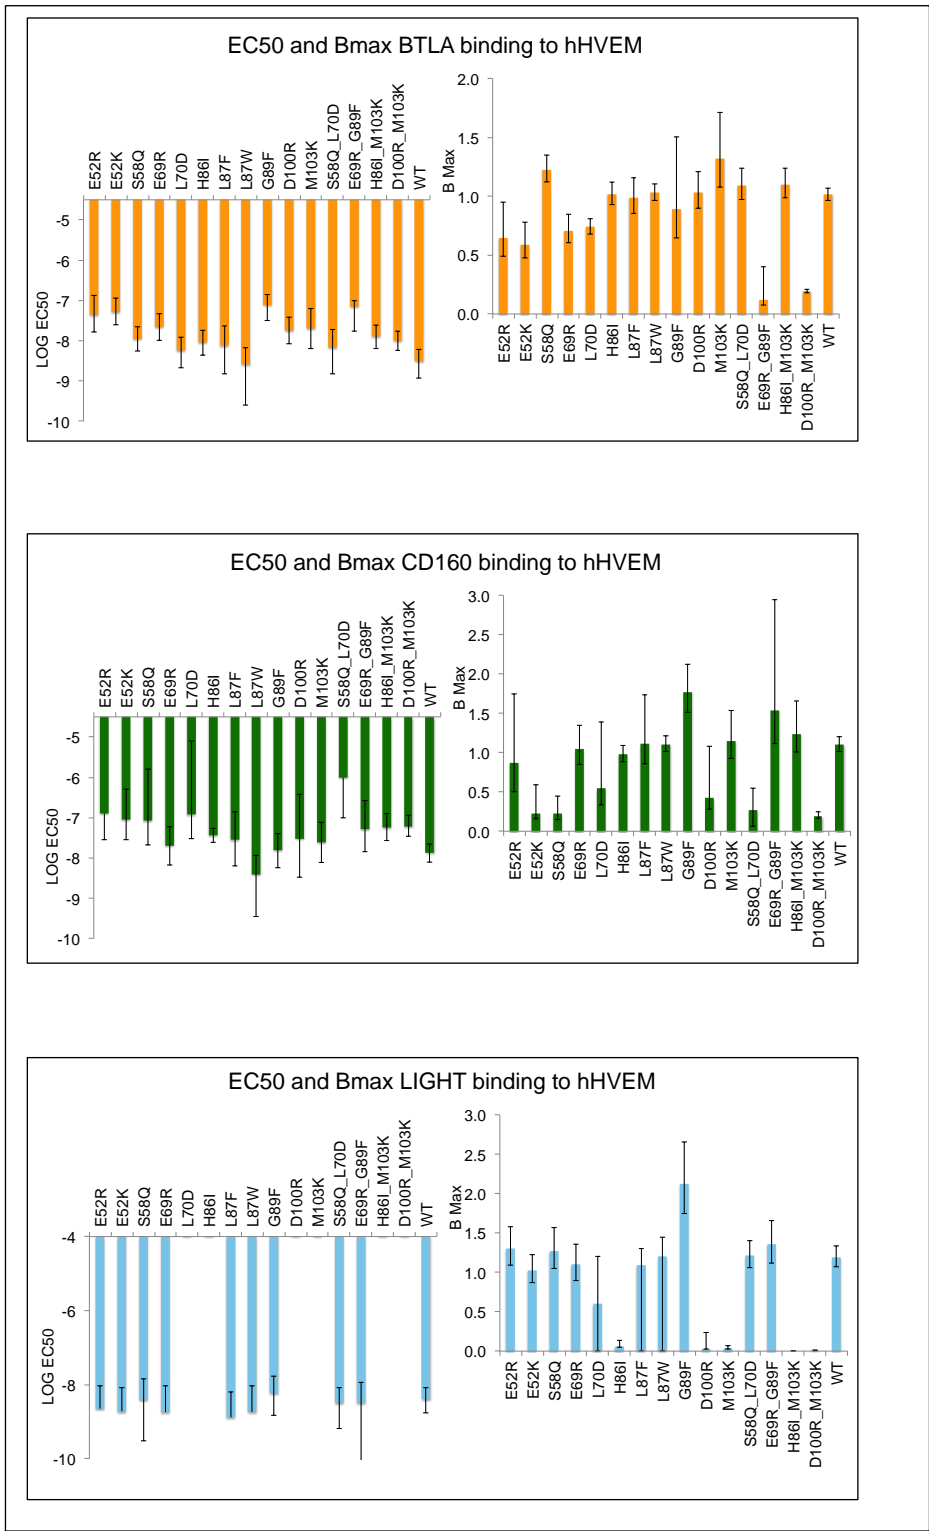

Supplementary Figure 5: FACS plots of binding of hHVEM WT and mutants to BTLA, CD160 and LIGHT ligands. These scatter plots show all cells gated for GFP on the X-axis and Anti-HIS on the Y-axis. A select number of plots are shown: for WT, and G89F, E52K, S58Q and H86I\_M103K mutant titrations, which are discussed in depth in the manuscript. Related to Fig. 2, 3 and 4 .

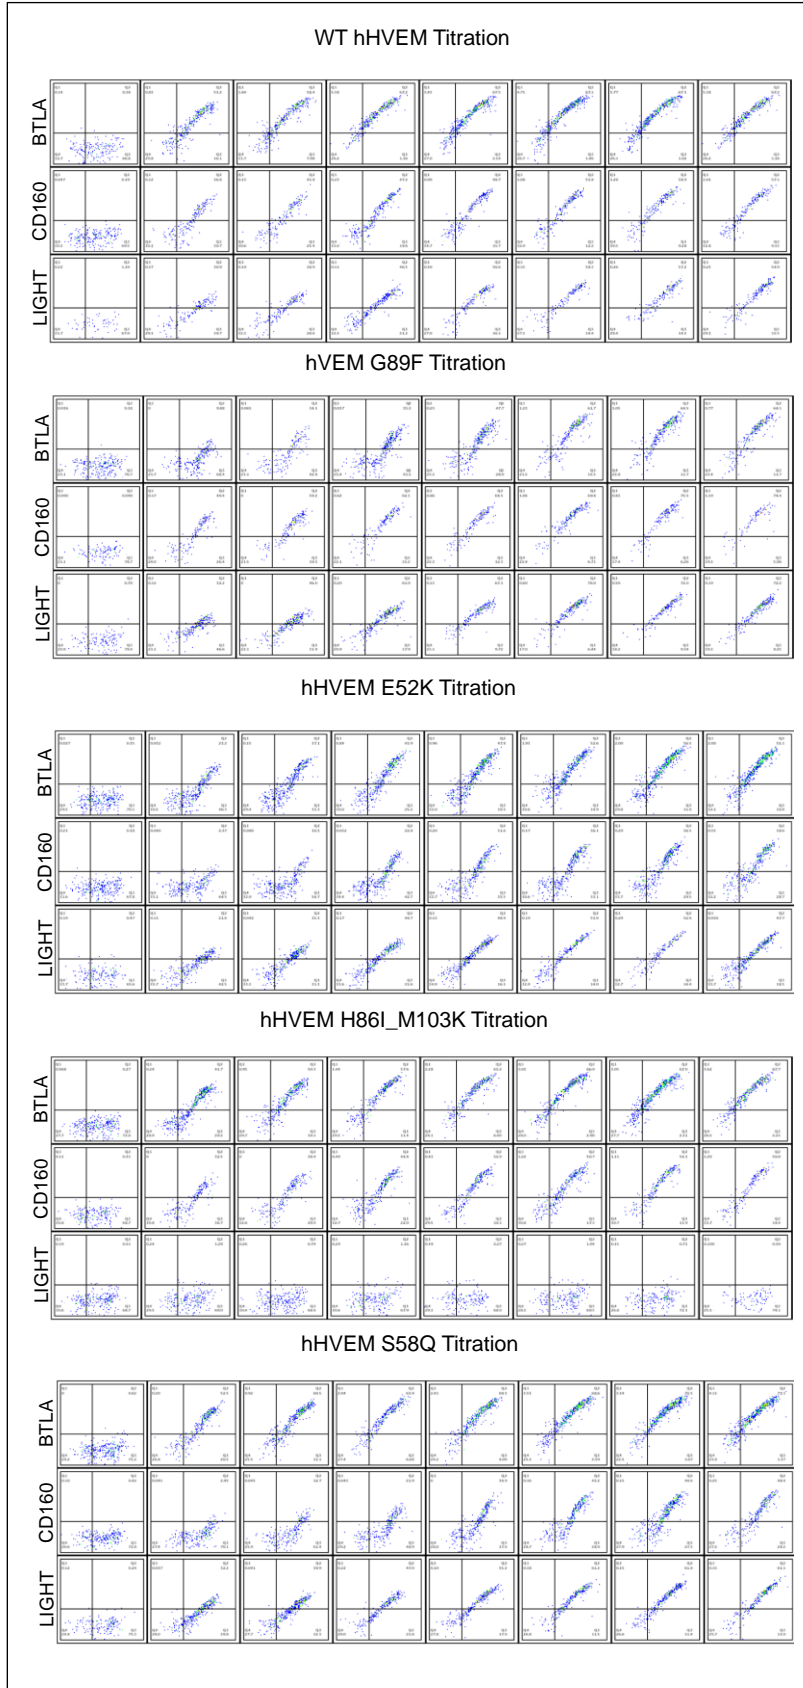



Supplementary Figure 6. Geometric mean of percent bound ligand as a function of concentration. Panels from left to right show HVEM binding of ligands LIGHT, BTLA and CD160, respectively. Different colors of lines refer to different mutant variants of HVEM: black circle: E52R, pink triangle: E69R, red diamond: L70D, red circle: H86I, purple square: L87F, light blue diamond: D100R, light green triangle: M103K, green circle: S58Q\_L70D, black square: E69R\_G89F, blue square: wild type HVEM. Related to Fig. 2, 3 and 4.

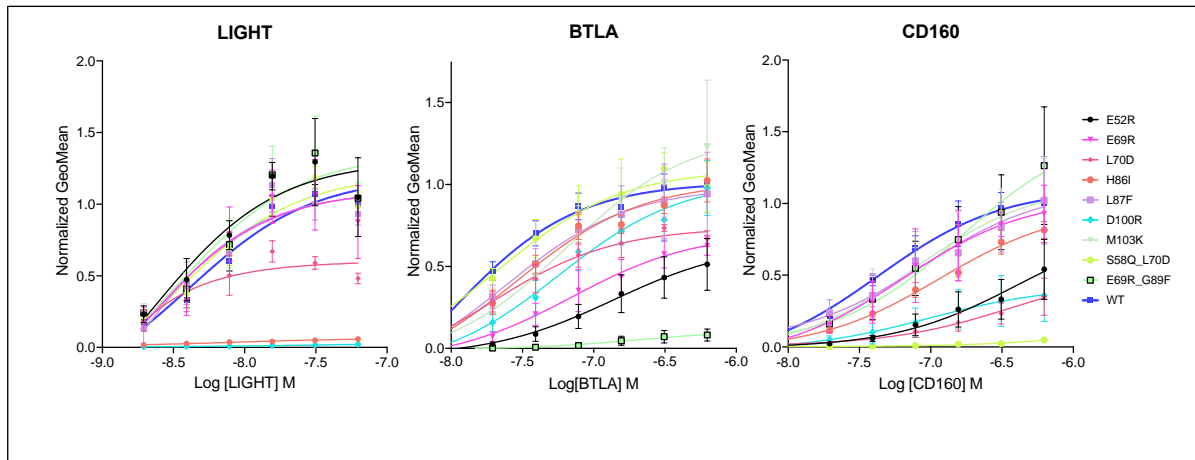

Supplementary Table 1: Rs-pharmacophore comparison for BTLA and CD160. The interface residues of HVEM:CD160 are in the first two columns, for BTLA in the last two columns. The corresponding rs-pharmacophore predicted residues for CD160 are shown in the third, for BTLA in the fifth columns. The selected mutations listed in the middle (fourth column). Bold-italic residues in the columns of HVEM represent effective positions for mutations. Sequence position is referenced from the UniProt database. Related to Fig. 1 and Fig 2.

| CD160:HVEM         |                             | Selected mutations | BTLA:HVEM         |                    |                             |             |
|--------------------|-----------------------------|--------------------|-------------------|--------------------|-----------------------------|-------------|
| Interface residues |                             |                    | RS-pharmacophores | Interface residues |                             |             |
| CD160              | HVEM                        |                    |                   | HVEM               | BTLA                        |             |
| N28                | <i>T71</i>                  | DENPQSTY           |                   | KNPQRSTY           | <i>G72, T71</i>             | Q37         |
| I29                | <i>G72, T71</i>             | KNQRSWY            |                   | HKNQW              | <i>G72, T71</i>             | L38         |
|                    |                             |                    | RK, R             | DENPQSTY           | <i>C53, E52, E69, G68</i>   | R42         |
| G66                | <b><i>D45</i></b>           | HST                | F                 | HKNQR              | <b><i>D45, E44</i></b>      | G76         |
|                    |                             |                    |                   | PY                 | <i>E44</i>                  | <i>T77</i>  |
| D67                | <b><i>S58</i></b>           | KNQRW              | LKQR              |                    |                             |             |
|                    |                             |                    |                   | KNQR               | <i>K43</i>                  | <i>S112</i> |
|                    |                             |                    | F                 | DENPQSTY           | <b><i>D45, K56</i></b>      | <i>R114</i> |
| G120               | <i>Y61</i>                  | NQRW               |                   | HKNQRY             | <i>Y61</i>                  | <i>S121</i> |
| I121               | <i>C75, V74</i>             | FWY                |                   | HKNPQRTWY          | <i>C75, V74</i>             | <i>L123</i> |
|                    |                             |                    |                   | HKNQRTWY           | <i>E76, K64</i>             | <i>N122</i> |
| R122               | <i>C75, S58</i>             | DEKNPQRSTWY        | LKQR              |                    |                             |             |
| Q124               | <i>K56, G72, S58, T73</i>   | DEHKNPQRSTWY       | LKQR              | KNQRTWY            | <i>C57, G72, S58, T73</i>   | <i>E125</i> |
| H126               | <i>C53, C67, G72, T71</i>   | DEHKNPQRSTWY       |                   |                    |                             |             |
|                    |                             |                    | R                 | DEHNPQRSTWY        | <b><i>E69, G68, T71</i></b> | <i>H127</i> |
| F127               | <b><i>D45, E46, P55</i></b> | 2                  | F                 |                    |                             |             |

Supplementary Table 2: Summary of rs-pharmacophores suggested for HVEM that are generated on the BTLA and CD160 interfaces. Recapitulation of wild type residues by rs-pharmacophore is



shown in the 3<sup>rd</sup> and 7<sup>th</sup> columns for CD160 and BTLA, respectively. Number of interacting residues for each position in HVEM are shown for CD160 (5<sup>th</sup> column) and BTLA (9<sup>th</sup> column). The last row, bold and bold-italic numbers represent the sums and averages, respectively. Related to Fig. 1 and Fig 2.

| HVEM | CD160            |                 |               |                           | BTLA             |                 |               |                           |
|------|------------------|-----------------|---------------|---------------------------|------------------|-----------------|---------------|---------------------------|
|      | Rs-pharmacophore | Wild type match | # of variants | # of interacting residues | Rs-pharmacophore | Wild type match | # of variants | # of interacting residues |
| K43  |                  |                 |               |                           | KNQR             | Yes             | 4             | 1                         |
| E44  |                  |                 |               |                           | HKNPQRY          | -               | 7             | 2                         |
| D45  | FHIST            | -               | 5             | 2                         | DEHKNPQRSTY      | Yes             | 11            | 2                         |
| E46  | FI               | -               | 2             | 1                         |                  |                 |               |                           |
| E52  |                  |                 |               |                           | DENPQSTY         | Yes             | 8             | 1                         |
| P55  | FI               | -               | 2             | 1                         |                  |                 |               |                           |
| K56  | DEHKNPQRST<br>WY | Yes             | 12            | 1                         | DENPQSTY         | -               | 8             | 1                         |
| S58  | DEHKNPQRST<br>WY | Yes             | 12            | 3                         | KNQRTWY          | -               | 7             | 1                         |
| Y61  | NQRW             | -               | 4             | 1                         | HKNQRY           | Yes             | 6             | 1                         |
| K64  |                  |                 |               |                           | HKNQRTWY         | Yes             | 8             | 1                         |
| G68  |                  |                 |               |                           | DEHNPQRSTWY      | -               | 11            | 2                         |
| E69  |                  |                 |               |                           | DEHNPQRSTWY      | Yes             | 11            | 2                         |
| T71  | DEHKNPQRST<br>WY | Yes             | 12            | 3                         | DEHKNPQRSTW<br>Y | Yes             | 12            | 3                         |
| G72  | DEHKNPQRST<br>WY | -               | 12            | 3                         | HKNPQRSTWY       | -               | 10            | 3                         |
| T73  | DEHKNPQRST<br>WY | Yes             | 12            | 1                         | KNQRTWY          | 1 Yes           | 7             | 1                         |
| V74  | FWY              | -               | 3             | 1                         | HKNPQRTWY        | -               | 9             | 1                         |
| E76  |                  |                 |               |                           | HKNQRTWY         | -               | 8             | 1                         |
|      |                  | sum: 4          | avg. :8       | avg. 2                    |                  | sum:8           | avg. 8        | avg. 2                    |

Supplementary Table 3: Interface residues of HVEM:LIGHT complex along with predicted rs-pharmacophore (3<sup>rd</sup> column) and suggested mutations (4<sup>th</sup> column). HVEM interacts with a dimer of LIGHT therefore asterisk (\*) indicates the residues from the other unit. Sequence positions are

numbered according to the UniProt database. Positions selected for mutations are shown in bold-italic. Related to Fig 2.

| Interface residues (LIGHT:HVEM) |                                 | RS-pharmacophore | Suggested mutations |
|---------------------------------|---------------------------------|------------------|---------------------|
| LIGHT                           | HVEM                            |                  |                     |
| R172*                           | N88, <b>G89</b> , S91           | DEHKNPQRSTWY     | G89IF               |
| Y173*                           | A85, N88, <b>H86</b> , I84, L90 | IKLMNQRV         | H86I                |
| P174*                           | <b>H86</b>                      | F                | H86I                |
| E175*                           | <b>H86</b>                      | KNRWY            | H86I                |
| G100                            | Q95                             | HKNQRWY          |                     |
| Q117                            | K92                             | KNQRW            |                     |
| G119                            | K92                             | HKNQRSTW         |                     |
| V196                            | <b>V129</b>                     | V                | V129K               |
| W198                            | <b>M103</b>                     | LP               | M103K               |
| R226                            | <b>D100</b>                     | DEHN PQSTY       | D100R               |
| R228                            | Q97, M98                        | DEHKNPQRSTWY     |                     |
| D229                            | Q95                             | HNQRWY           |                     |

Supplementary Table 4: HVEM variants suggested by LIGHT-specific rs-pharmacophore. The number of interacting residues in LIGHT are shown for each HVEM residue position (5<sup>th</sup> column). Corresponding wild type residues to the rs-pharmacophore are in the 3<sup>rd</sup> column. In the last row summarized the column sums or averages. Related to Fig 2.

| <b>HVEM</b> | <b>Rs-pharmacophore</b> | <b>Wild type match</b> | <b># of variants</b> | <b># interacting residues</b> |
|-------------|-------------------------|------------------------|----------------------|-------------------------------|
| I84         | IKLMNQRV                | Yes                    | 8                    | 1                             |
| A85         | IKLMNQRV                | -                      | 8                    | 1                             |
| H86         | FIKLMKNQRVWY            | -                      | 12                   | 3                             |
| N88         | DEHIKLMNPQRSTWYV        | Yes                    | 16                   | 2                             |
| G89         | DEHKNPQRSTWY            | -                      | 12                   | 1                             |
| L90         | IKLMNQRV                | Yes                    | 8                    | 1                             |
| S91         | DEHKNPQRSTWY            | Yes                    | 12                   | 1                             |
| K92         | HKNQRSTW                | Yes                    | 8                    | 2                             |
| Q95         | HKNQRWY                 | Yes                    | 7                    | 2                             |
| Q97         | DEHKNPQRSTWY            | Yes                    | 12                   | 1                             |
| M98         | DEHKNPQRSTWY            | -                      | 12                   | 1                             |
| D100        | DEHNPQSTY               | Yes                    | 9                    | 1                             |
| V129        | V                       | Yes                    | 1                    | 1                             |
| M103        | LP                      | -                      | 2                    | 1                             |
|             |                         | sum: 9                 | avg.: 9              | avg.: 1                       |

Supplementary Table 5: Welch's t-test and p-value of each mutation on normalized percentage bound of HVEM with BTLA, CD160, and LIGHT. The mean and std. deviations were calculated from three independent samples. Values at 95% confidence level are in bold. Related to Table 1.

|             | BTLA     |           | CD160    |           | LIGHT    |           | P-value         |                 |                 |
|-------------|----------|-----------|----------|-----------|----------|-----------|-----------------|-----------------|-----------------|
|             | Mean     | Std. dev. | Mean     | Std. dev. | Mean     | Std. dev. | BTLA:<br>CD160  | CD160<br>:LIGHT | BTLA:<br>LIGHT  |
| D45F        | 1.13E+00 | 1.36E-01  | 1.22E+00 | 1.56E-01  | 9.43E-01 | 2.11E-02  | 4.72E-01        | 8.83E-02        | 1.41E-01        |
| E52R        | 3.13E-01 | 2.70E-01  | 2.95E-01 | 3.07E-02  | 9.35E-01 | 6.05E-02  | 9.19E-01        | <b>5.30E-04</b> | <b>5.12E-02</b> |
| E52K        | 4.16E-01 | 1.12E-01  | 1.69E-01 | 1.06E-01  | 9.68E-01 | 2.91E-02  | 4.98E-02        | <b>3.56E-03</b> | <b>9.62E-03</b> |
| S58L        | 8.64E-01 | 1.07E-01  | 3.25E-01 | 1.36E-01  | 1.07E+00 | 4.65E-02  | <b>6.73E-03</b> | <b>6.24E-03</b> | 6.56E-02        |
| S58K        | 9.15E-01 | 2.53E-02  | 4.55E-01 | 4.85E-01  | 9.57E-01 | 3.30E-02  | 2.42E-01        | 2.14E-01        | 1.59E-01        |
| S58Q        | 1.34E+00 | 1.67E-01  | 2.43E-01 | 6.72E-02  | 1.06E+00 | 3.39E-02  | <b>3.17E-03</b> | <b>3.63E-04</b> | 9.58E-02        |
| S58R        | 1.09E+00 | 2.25E-01  | 3.64E-01 | 3.21E-01  | 1.01E+00 | 3.27E-02  | 3.85E-02        | 7.09E-02        | 6.31E-01        |
| E69R        | 5.07E-01 | 1.21E-01  | 1.04E+00 | 1.11E-01  | 8.64E-01 | 9.99E-02  | <b>4.90E-03</b> | 1.05E-01        | <b>1.82E-02</b> |
| L70D        | 1.25E+00 | 1.10E-01  | 6.67E-01 | 6.52E-02  | 1.02E+00 | 2.41E-02  | <b>3.10E-03</b> | <b>5.69E-03</b> | 6.23E-02        |
| H86I        | 1.02E+00 | 2.49E-02  | 8.28E-01 | 5.87E-02  | 3.29E-01 | 1.91E-01  | 1.79E-02        | 3.62E-02        | 2.30E-02        |
| L87F        | 9.06E-01 | 5.68E-02  | 1.47E+00 | 1.77E-01  | 1.03E+00 | 2.35E-02  | <b>2.27E-02</b> | <b>4.71E-02</b> | 4.97E-02        |
| L87Y        | 1.17E+00 | 1.25E-01  | 1.27E+00 | 2.05E-01  | 1.02E+00 | 2.41E-02  | 5.06E-01        | 1.67E-01        | 1.74E-01        |
| L87W        | 1.18E+00 | 1.48E-01  | 1.90E+00 | 3.75E-01  | 9.81E-01 | 1.25E-02  | <b>6.58E-02</b> | <b>5.15E-02</b> | 1.41E-01        |
| G89I        | 9.25E-02 | 8.95E-02  | 1.80E-01 | 4.60E-03  | 3.49E-01 | 1.00E-01  | 2.33E-01        | 9.94E-02        | 3.03E-02        |
| G89F        | 8.65E-02 | 1.26E-01  | 1.47E+00 | 3.42E-01  | 1.08E+00 | 3.51E-02  | <b>1.17E-02</b> | 1.83E-01        | <b>3.21E-03</b> |
| D100R       | 8.77E-01 | 3.67E-02  | 3.83E-01 | 5.85E-02  | 1.42E-01 | 4.14E-02  | 6.40E-04        | 5.91E-03        | 2.39E-05        |
| M103K       | 7.73E-01 | 1.27E-01  | 7.03E-01 | 2.29E-03  | 2.57E-01 | 2.60E-02  | 4.43E-01        | <b>1.04E-03</b> | <b>1.64E-02</b> |
| V129K       | 1.12E+00 | 5.97E-02  | 1.01E+00 | 2.43E-02  | 9.11E-01 | 3.16E-02  | 6.78E-02        | 1.33E-02        | 1.17E-02        |
| S58Q:L70D   | 1.15E+00 | 1.48E-01  | 1.69E-01 | 8.34E-02  | 1.05E+00 | 3.21E-02  | <b>1.75E-03</b> | <b>1.00E-03</b> | 3.85E-01        |
| E69R:G89F   | 1.11E-01 | 6.90E-02  | 1.11E+00 | 2.72E-01  | 9.77E-01 | 8.56E-02  | <b>1.86E-02</b> | 4.88E-01        | <b>2.19E-04</b> |
| H86:G89I    | 1.62E-01 | 7.68E-02  | 3.60E-01 | 1.32E-01  | 1.38E-01 | 8.31E-02  | 1.04E-01        | 8.08E-02        | 7.29E-01        |
| H86I:D100R  | 6.03E-01 | 1.09E-01  | 2.20E-01 | 7.08E-02  | 9.49E-02 | 3.97E-02  | <b>1.05E-02</b> | 7.19E-02        | <b>8.56E-03</b> |
| H86I:M103K  | 1.03E+00 | 4.82E-02  | 8.12E-01 | 1.04E-01  | 9.66E-02 | 6.60E-02  | 4.85E-02        | <b>1.22E-03</b> | <b>7.31E-05</b> |
| G89I:D100R  | 7.87E-01 | 9.49E-02  | 3.02E-01 | 5.84E-02  | 1.01E-01 | 3.97E-02  | 3.34E-03        | 1.08E-02        | 2.32E-03        |
| D100R:M103K | 8.24E-01 | 9.79E-02  | 2.27E-01 | 8.35E-02  | 8.10E-02 | 5.84E-02  | <b>1.44E-03</b> | 7.53E-02        | <b>1.00E-03</b> |

Supplementary Table 6: Listing equivalent residue positions among the different PDB files (listed in the first row using 4 letter PDB code and a chain identifier) and UNIPROT, for all the interface residues in HVEM. Related to Fig 1.

| UniProt | 2AW2.B | 4RSU.D | 6NG3 |
|---------|--------|--------|------|
| K43     | 5      | 43     | 1043 |
| E44     | 6      | 44     | 1044 |
| D45     | 7      | 45     | 1045 |
| E46     | 8      | 46     | 1046 |
| E52     | 14     | 52     | 1052 |
| C53     | 15     | 53     | 1053 |
| P55     | 17     | 55     | 1055 |
| K56     | 18     | 56     | 1056 |
| C57     | 19     | 57     | 1057 |
| S58     | 20     | 58     | 1058 |
| Y61     | 23     | 61     | 1061 |
| K64     | 26     | 64     | 1064 |
| C67     | 29     | 67     | 1067 |
| G68     | 30     | 68     | 1068 |
| E69     | 31     | 69     | 1069 |
| T71     | 33     | 71     | 1071 |
| G72     | 34     | 72     | 1072 |
| T73     | 35     | 73     | 1073 |
| V74     | 36     | 74     | 1074 |
| C75     | 37     | 75     | 1075 |
| E76     | 38     | 76     | 1076 |
